# Supplementary material for: Internal gradient distributions: A susceptibility-derived tensor delivering morphologies by magnetic resonance
Source: PubMed Central journal article supplement (PMC5468317; doi:10.1038/s41598-017-03277-9), 2017-06-12
Supplement: 41598_2017_3277_MOESM1_ESM.pdf [file 41598_2017_3277_MOESM1_ESM.pdf]

## Supporting Information

Internal gradient distributions: A susceptibility-derived tensor delivering morphologies by magnetic resonance

Gonzalo A. Álvarez, Noam Shemesh, and Lucio Frydman

### Supporting Information 1: A formal derivation of the internal gradient distribution tensor

The normalized magnetization arising from an ensemble of non-interacting and equivalent spins under the effects of a sequence of pulses or modulating gradients is  $M(t) = \langle e^{-i\phi(t)} \rangle$ , where the brackets account for an ensemble average over the random phases  $\phi(t)$ . For the spin-echo sequences being considered in this work, the average phase  $\langle \phi(t) \rangle$  will be equal to zero. Assuming that the random phase  $\phi(t)$  has a Gaussian distribution [48],  $M(t) = \exp\{-\frac{1}{2}\langle \phi^2(t) \rangle\}$ , the signal will evidence a decay depending on the attenuation factor  $\beta(t) = \frac{1}{2}\langle \phi^2(t) \rangle$ . With most sources of decoherence normalized out by the constant-time, constant-pulses-number, fixed-number-of-gradients nature of the NOGSE sequences assayed [20, 21, 44], we ascribe to diffusion effects as the sole source of this attenuation. It is then convenient to describe the  $\beta$ -factor in terms of the gradient modulating function  $\vec{G}_{\text{tot}}(t)$  [45–47]:

$$\beta(TE) = \frac{\gamma^2}{2} \int_0^{TE} dt' \int_0^{TE} dt'' \vec{G}_{\text{tot}}^\dagger(t') \cdot \langle \vec{r}(t') \vec{r}(t'') \rangle \cdot \vec{G}_{\text{tot}}(t'') \quad (\text{S.1})$$

$$= \frac{\gamma^2}{2} \int_{-\infty}^{\infty} dt' \int_{-\infty}^{\infty} dt'' \vec{G}_{\text{tot}}^\dagger(t', TE) \cdot \mathbf{g}(t'' - t') \cdot \vec{G}_{\text{tot}}(t'', TE), \quad (\text{S.2})$$

where in the second equation we redefined the gradient modulation function such that  $\vec{G}_{\text{tot}}(t', TE) = 0$  if  $t' < 0$  or  $t' > TE$  (i.e., outside the total evolution time range). The evolution is given in terms of a tensorial correlation function reflecting the displacements' fluctuations  $\mathbf{g}(\tau) = \langle \Delta \vec{r}(t') \Delta \vec{r}(t' + \tau) \rangle$ ; i.e.  $g_{i,j} = \langle \Delta x_i(t') \Delta x_j(t' + \tau) \rangle$  with  $i, j$  representing the spatial axis  $x, y, z$ . This correlation function can be related to a diffusion power spectrum  $\mathbf{D}(\omega)$  [4, 5, 45, 46] by a Fourier transform:  $\mathcal{FT}\{\mathbf{g}(\tau)\} / \sqrt{2\pi} = \mathbf{D}(\omega) / \omega^2$ . In the event of anisotropic diffusion, Eq. (S.1) can thus be recast in its Fourier representation [45–47] as:

$$\beta(TE) = \frac{\gamma^2}{2} \int_{-\infty}^{\infty} d\omega \vec{G}_{\text{tot}}^\dagger(\omega, TE) \cdot \frac{\mathbf{D}(\omega)}{\omega^2} \cdot \vec{G}_{\text{tot}}(\omega, TE), \quad (\text{S.3})$$

where  $\vec{\mathcal{G}}_{\text{tot}}(\omega, TE) = \vec{\mathcal{G}}(\omega, TE) + \vec{\mathcal{G}}_0(\omega, TE)$ , is the filter function introduced in Eq. (1) of the main text.

Considering the applied gradient modulation  $\vec{G}(t', TE)$ , the internal background gradient modulation  $\vec{G}_0(t', TE)$ , and their respective filter functions  $\vec{\mathcal{G}}(\omega, TE)$  and  $\vec{\mathcal{G}}_0(\omega, TE)$ , the argument of the integral defining this attenuation factor can then be expanded as

$$\begin{aligned} \vec{\mathcal{G}}_{\text{tot}}^\dagger(\omega, TE) \cdot \frac{\mathbf{D}(\omega)}{\omega^2} \cdot \vec{\mathcal{G}}_{\text{tot}}(\omega, TE) &= \underbrace{\vec{\mathcal{G}}^\dagger(\omega, TE) \cdot \frac{\mathbf{D}(\omega)}{\omega^2} \cdot \vec{\mathcal{G}}(\omega, TE)}_{\text{external gradient dephasing}} \\ &+ \underbrace{\vec{\mathcal{G}}_0^\dagger(\omega, TE) \cdot \frac{\mathbf{D}(\omega)}{\omega^2} \cdot \vec{\mathcal{G}}_0(\omega, TE)}_{\text{internal gradient dephasing}} \\ &+ 2\Re \left\{ \underbrace{\vec{\mathcal{G}}^\dagger(\omega, TE) \cdot \frac{\mathbf{D}(\omega)}{\omega^2} \cdot \vec{\mathcal{G}}_0(\omega, TE)}_{\text{cross-term}} \right\}. \end{aligned} \quad (\text{S.4})$$

This leads to Eq. (2) of the main text, where  $\beta(TE) = \beta_{G^2}(TE) + \beta_{G_0^2}(TE) + \beta_{\vec{\mathcal{G}} \cdot \vec{\mathcal{G}}_0}(TE)$  and the normalized spin magnetization becomes

$$M(TE) = M_{G^2}(TE) \times M_{G_0^2}(TE) \times M_{\vec{\mathcal{G}} \cdot \vec{\mathcal{G}}_0}(TE). \quad (\text{S.5})$$

Assuming a  $\vec{G}(t', TE) = \vec{G} f(t', TE)$ , involving a strength vector  $\vec{G}$  and a time-dependency  $f(t', TE)$ , then  $\vec{\mathcal{G}}(\omega, TE) = \vec{G} F(\omega, TE)$  with  $F(\omega, TE)$  the Fourier transform of  $f(t', TE)$ . The applied gradient diffusion attenuation becomes

$$M_{G^2}(TE) = \exp \{ -\beta_{G^2}(TE) \}, \quad (\text{S.6})$$

where

$$\beta_{G^2}(TE) = \frac{\gamma^2 G^2}{2} \int_{-\infty}^{\infty} d\omega \frac{D_G(\omega)}{\omega^2} |F(\omega, TE)|^2, \quad (\text{S.7})$$

and  $D_G(\omega) = [\vec{\mathcal{G}}^\dagger \cdot \mathbf{D}(\omega) \cdot \vec{\mathcal{G}}] / G^2$ . Likewise, the pure background gradient decay is independent of the applied gradient

$$M_{G_0^2}(TE) = \exp \{ -\beta_{G_0^2}(TE) \}, \quad (\text{S.8})$$

where

$$\beta_{G_0^2}(TE, \vec{G}_0) = \frac{\gamma^2 G_0^2}{2} \int_{-\infty}^{\infty} d\omega \frac{D_{G_0}(\omega)}{\omega^2} |F_0(\omega, TE)|^2, \quad (\text{S.9})$$

with  $D_{G_0}(\omega) = [\vec{G}_0^\dagger \cdot \mathbf{D}(\omega) \cdot \vec{G}_0] / G_0^2$ , and we have again assumed that  $\vec{G}_0(t', TE) = \vec{G}_0 f_0(t', TE)$  and thereby  $\vec{G}_0(\omega, TE) = \vec{G}_0 F_0(\omega, TE)$ . Finally, the cross-term attenuation will be

$$\beta_{\vec{G}, \vec{G}_0}(TE, \vec{G}, \vec{G}_0) = \frac{\gamma^2}{2} \vec{G}^\dagger \cdot \left[ \int_{-\infty}^{\infty} d\omega 2\text{Re} \left\{ F^\dagger(\omega, TE) \frac{\mathbf{D}(\omega)}{\omega^2} F_0(\omega, TE) \right\} \right] \cdot \vec{G}_0 = \vec{G}^\dagger \cdot \tilde{\mathbf{D}} \cdot \vec{G}_0, \quad (\text{S.10})$$

where  $\tilde{\mathbf{D}} = \frac{\gamma^2}{2} \left[ \int_{-\infty}^{\infty} d\omega 2\text{Re} \left\{ F^\dagger(\omega, TE) \frac{\mathbf{D}(\omega)}{\omega^2} F_0(\omega, TE) \right\} \right]$ .

Our derivations also assumed that  $\vec{G}_0$  can be described by a Gaussian distribution. The cross-term contribution to the attenuation factor turns out to be

$$\beta_{\vec{G}, \vec{G}_0}(TE) = \vec{G}^\dagger \cdot \tilde{\mathbf{D}} \cdot \langle \vec{G}_0 \rangle + \vec{G}^\dagger \cdot \tilde{\mathbf{D}} \cdot \langle \Delta \vec{G}_0 \Delta \vec{G}_0 \rangle \cdot \tilde{\mathbf{D}} \cdot \vec{G}, \quad (\text{S.11})$$

where  $\Delta \vec{G}_0 = \vec{G}_0 - \langle \vec{G}_0 \rangle$  and  $\langle \Delta \vec{G}_0 \Delta \vec{G}_0 \rangle$  is the internal gradient-distribution tensor (IGDT). This second term is always positive, since it is a quadratic term, while the first term depends on the relative sign of the parallel component of  $[\vec{G}^\dagger \cdot \tilde{\mathbf{D}}]_{\parallel}$  to the background gradient  $G_0$ .

For an isotropic diffusion  $\mathbf{D}(\omega) = D(\omega)\mathbf{I}$ , the attenuation factor get the simplified form

$$\beta_{\vec{G}, \vec{G}_0}(TE) = \tilde{D}_{\text{iso}} \vec{G}^\dagger \cdot \langle \vec{G}_0 \rangle + \tilde{D}_{\text{iso}}^2 \vec{G}^\dagger \cdot \langle \Delta \vec{G}_0 \Delta \vec{G}_0 \rangle \cdot \vec{G}, \quad (\text{S.12})$$

where  $\tilde{D}_{\text{iso}} = \frac{\gamma^2}{2} \left[ \int_{-\infty}^{\infty} d\omega 2\text{Re} \left\{ F^\dagger(\omega, TE) \frac{D(\omega)}{\omega^2} F_0(\omega, TE) \right\} \right]$ .

As an example on the use of this formalism, we consider the sequence of Fig. 1 of the main text and assume free diffusion to derive Eq. (3-5) of the main text. For free diffusion only the tail of the displacement power spectrum  $D(\omega) \propto 1/\omega^2$  is important [20, 44]. The purely applied-gradient diffusion term  $M_{G^2}(TE)$  is as derived for a CPMG sequence [44]

$$M_{G^2}(TE) = \exp \left\{ -\frac{1}{12} \gamma^2 G^2 D_0 \frac{TE^3}{N^2} \right\}, \quad (\text{S.13})$$

where the delay  $x = TE/N$ . The pure background gradient decay term is in turn the one that corresponds to a spin-echo modulation [44]

$$M_{G_0^2}(TE, N) = \exp \left\{ -\frac{1}{12} \gamma^2 G_0^2 D_0 TE^3 \right\}, \quad (\text{S.14})$$

which is independent of  $x$ . The cross-term signal-decay contribution is calculated from Eq. (S.10) leading to

$$M_{\vec{G}, \vec{G}_0}(TE) = \exp \left\{ \frac{1}{4} \gamma^2 \vec{G} \cdot \vec{G}_0 D_0 \frac{TE^3}{N^2} \right\}. \quad (\text{S.15})$$

**Supporting Information 2: sNOGSE/aNOGSE's: Analytical attenuation expressions for the general case of anisotropic diffusion**

We calculate next the normalized spin signal arising from Eq. (S.5),

$$M^{(s)}_{\text{a}}^{\text{NOGSE}}(TE) = M_{G^2}^{(s)\text{NOGSE}}(TE) \times M_{G_0^2}(TE) \times M_{\vec{G}, \vec{G}_0}^{(s)\text{NOGSE}}(TE), \quad (\text{S.16})$$

for the symmetric and asymmetric non-uniform gradient spin echo modulations ( $^{(s)}_{\text{a}}$ NOGSE) introduced in Fig. 2. As described in the main text,

$$M_{G^2}^{s\text{NOGSE}}(TE) = M_{G^2}^{a\text{NOGSE}}(TE) \quad (\text{S.17})$$

as a result of

$$F^{s\text{NOGSE}}(\omega, TE) = F^{a\text{NOGSE}}(\omega, TE) \quad (\text{S.18})$$

in Eq. (S.7). The pure background gradient signal contribution is therefore independent of the applied gradient modulation and direction, providing the same weight for both NOGSE sequences. The cross-term in the attenuation factor for sNOGSE is zero but that for aNOGSE is not, as the products  $F^{s\text{NOGSE}\dagger}(\omega, TE) F_0(\omega, TE)$  and  $F^{a\text{NOGSE}\dagger}(\omega, TE) F_0(\omega, TE)$  in Eq. (S.10) are odd and even functions of  $\omega$ , respectively. This cross-term between the aNOGSE-modulated applied gradient and the background gradient  $G_0$  will be

$$\beta_{\vec{G}, \vec{G}_0}(TE) = \frac{\gamma^2}{2} \vec{G} \cdot \left[ \int_{-\infty}^{\infty} d\omega 2\text{Re} \left\{ (F^{a\text{NOGSE}}(\omega, TE))^{\dagger} \frac{\mathbf{D}(\omega)}{\omega^2} F_0(\omega, TE) \right\} \right] \cdot \vec{G}_0 = \vec{G} \cdot \tilde{\mathbf{D}} \cdot \vec{G}_0. \quad (\text{S.19})$$

As explained in the main text, the measured spin signal decays for the sNOGSE and aNOGSE sequences as described in Fig. 2e, factor out all non-diffusing sources of decoherence after normalizing them by the single-echo signal [20, 21, 44]. The amplitude of the

NOGSE modulation is then

$$M_{CPMG}(TE)/M_{Single-echo}(TE) = \exp(-\Delta\beta) = \exp[-(\beta^{CPMG} - \beta^{Single-echo})], \quad (\text{S.20})$$

where the amplitude contrast of the attenuation factors  $\Delta\beta = \beta^{CPMG} - \beta^{Single-echo}$ . As the contribution to the attenuation factor that purely depends of the background gradient is independent of the applied gradient modulation its contribution  $\Delta\beta_{G_0^2}$  is null, and the amplitude of the attenuation factors is then

$$\Delta\beta = \Delta\beta_{G^2} + \Delta\beta_{\vec{G}, \vec{G}_0}. \quad (\text{S.21})$$

For the sNOGSE sequence  $\Delta\beta^s = \Delta\beta_{G^2}$  as the cross-term is null, and  $\Delta\beta^a = \Delta\beta_{G^2} + \Delta\beta_{\vec{G}, \vec{G}_0}$  for the aNOGSE modulation curve. Notice that the contribution of the term that only depends of the applied gradient  $\Delta\beta_{G^2}$  is the same for both sequences according to Eqs. (S.17) and (S.18). Then by subtracting  $\Delta\beta^a$  and  $\Delta\beta^s$ , the  $\Delta\beta_{\vec{G}, \vec{G}_0}$  cross-term contribution to the amplitude modulation is obtained, where

$$\Delta\beta_{\vec{G}, \vec{G}_0} = \frac{\gamma^2}{2} \vec{G} \cdot \left[ \int_{-\infty}^{\infty} d\omega \, 2\text{Re} \left\{ [F^{aNOGSE}(\omega, TE) - F^{sNOGSE}(\omega, TE)]^\dagger \frac{\mathbf{D}(\omega)}{\omega^2} F_0(\omega, TE) \right\} \right] \cdot \vec{G}_0 \quad (\text{S.22})$$

$$= \vec{G} \cdot \Delta\tilde{\mathbf{D}} \cdot \vec{G}_0, \quad (\text{S.23})$$

with  $\Delta\tilde{\mathbf{D}} = \frac{\gamma^2}{2} \int_{-\infty}^{\infty} d\omega \, 2\text{Re} \left\{ [F^{aNOGSE}(\omega, TE) - F^{sNOGSE}(\omega, TE)]^\dagger \frac{\mathbf{D}(\omega)}{\omega^2} F_0(\omega, TE) \right\}$ . Assuming as before a Gaussian distribution for  $G_0$ ,

$$\Delta\beta_{\vec{G}, \vec{G}_0} = \vec{G} \cdot \Delta\tilde{\mathbf{D}} \cdot \langle \vec{G}_0 \rangle + \vec{G} \cdot \Delta\tilde{\mathbf{D}} \cdot \langle \Delta\vec{G}_0 \Delta\vec{G}_0 \rangle \cdot \Delta\tilde{\mathbf{D}} \cdot \vec{G}. \quad (\text{S.24})$$

where the first term depends on the relative sign of the parallel component of  $[\vec{G} \cdot \mathbf{D}(\omega)]_{\parallel}$  to the background gradient  $G_0$ , which depends of the anisotropic restricted-diffusion weighting. Notice that the second term is always positive and it contains the IGDT  $\langle \Delta\vec{G}_0 \Delta\vec{G}_0 \rangle$ . This was the expression used to evaluate the results presented in Fig. 4 after being normalized by  $\Delta\beta^s = \Delta\beta_{G^2}$  to remove the anisotropic weighting due to restricted diffusion effects. For an isotropic diffusion  $\mathbf{D}(\omega) = D(\omega)\mathbf{I}$ , this gets simplified to

$$\Delta\beta_{\vec{G}, \vec{G}_0} = \Delta\tilde{D}_{\text{iso}} \vec{G} \cdot \langle \vec{G}_0 \rangle + \Delta\tilde{D}_{\text{iso}}^2 \vec{G} \cdot \langle \Delta\vec{G}_0 \Delta\vec{G}_0 \rangle \cdot \vec{G}. \quad (\text{S.25})$$

where  $\Delta\tilde{D}_{\text{iso}} = \frac{\gamma^2}{2} \int_{-\infty}^{\infty} d\omega \, 2\text{Re} \left\{ [F^{aNOGSE}(\omega, TE) - F^{sNOGSE}(\omega, TE)]^\dagger D(\omega) F_0(\omega, TE) \right\}$ .

**Supporting Information 3: sNOGSE/aNOGSE analytical expressions for the case of free, unrestricted diffusion**

For free diffusion only the tail of the displacement power spectrum  $D(\omega) \propto 1/\omega^2$  will be important, as it is this short-times regime active before restriction effects are seen, that matters [20, 44]. The purely applied-gradient diffusion term  $M_{G^2}^{(s)\text{NOGSE}}(TE)$  is then given by [44]

$$M_{G^2}^{(s)\text{NOGSE}}(TE) = \exp \left\{ -\frac{1}{12} \gamma^2 G^2 D_0 [(N-2)x^3 + 2y^3] \right\}, \quad (\text{S.26})$$

where  $(N-2)x + 2y = TE_{\text{NOGSE}} = TE/2$  (see Fig. 2 of the main text for definitions). The pure background gradient decay term is in turn

$$M_{G_0^2}(TE, N) = \exp \left\{ -\frac{1}{12} \gamma^2 G_0^2 D_0 TE^3 \right\}, \quad (\text{S.27})$$

which is independent of  $x$  and  $y$ , and therefore of the applied gradient modulation as was mentioned in the manuscript.

The cross-term signal-decay contribution for sNOGSE is zero as described before, and the one for aNOGSE will be

$$M_{\vec{G}\vec{G}_0}^{a\text{NOGSE}}(TE) = \exp \left\{ -\frac{1}{4} \gamma^2 \vec{G} \cdot \vec{G}_0 D_0 TE_{\text{NOGSE}} (-1)^{N/2} \left[ 2y^2 - \left( 1 + (-1)^{N/2} \right) x^2 \right] \right\}. \quad (\text{S.28})$$

Notice that the sign of the attenuation factor for this cross-term contribution depends of the relative sign of  $G_{\parallel}G_0$ , where  $G_{\parallel}$  is the applied component of the  $G$ -gradient that is parallel to the background gradient vector. The extremes of this attenuation arise for  $x = y = TE_{\text{NOGSE}}/N$  (CPMG-like modulation)

$$\beta_{\vec{G}\vec{G}_0}^{\text{CPMG}}(TE) = -\frac{1}{4} \gamma^2 \vec{G} \cdot \vec{G}_0 D_0 \frac{TE_{\text{NOGSE}}^3}{N^2} \left( (-1)^{N/2} - 1 \right), \quad (\text{S.29})$$

and for  $y = TE_{\text{NOGSE}}/2$  and  $x = 0$  (single-echo modulation)

$$\beta_{\vec{G}\vec{G}_0}^{\text{Single-echo}}(TE) = -\frac{1}{8} \gamma^2 \vec{G} \cdot \vec{G}_0 D_0 TE_{\text{NOGSE}}^3 (-1)^{N/2}. \quad (\text{S.30})$$

Given the  $(-1)^{N/2}$  factor in Eq. (S.28) it follows that if  $N/2$  is even,  $\beta_{\vec{G}\vec{G}_0}^{\text{CPMG}}(TE) = 0$  and the contrast contribution for the difference of attenuation factors is

$$\Delta\beta_{\vec{G}\vec{G}_0} = \frac{1}{8} \gamma^2 \vec{G} \cdot \vec{G}_0 D_0 TE_{\text{NOGSE}}^3; \quad (\text{S.31})$$

i.e., it depends on the relative sign of  $G_{\parallel}$  and  $G_0$ . If  $N/2$  is odd  $\beta_{\vec{G}, \vec{G}_0}^{CPMG}(TE) \neq 0$ ; but for  $N/2$  even the attenuation decays with  $1/N^2$ , and this makes the contrast lower. Assuming a Gaussian distribution for  $G_0$ ,

$$\begin{aligned} \beta_{\vec{G}, \vec{G}_0}(TE) = & -\frac{1}{4}\gamma^2 D_0 TE_{NOGSE} (-1)^{N/2} (2y^2 - (1 + (-1)^{N/2}) x^2) \vec{G} \cdot \langle \vec{G}_0 \rangle \\ & + \frac{1}{32}\gamma^4 D_0^2 TE_{NOGSE}^2 \left[ 2y^2 - (1 + (-1)^{N/2}) x^2 \right]^2 \left\langle \left[ \vec{G} \cdot (\vec{G}_0 - \langle \vec{G}_0 \rangle) \right]^2 \right\rangle. \end{aligned} \quad (\text{S.32})$$

The attenuation factor contrast amplitude is then

$$\Delta\beta_{\vec{G}, \vec{G}_0} = \frac{1}{8}\gamma^2 D_0 TE_{NOGSE}^3 \vec{G} \cdot \langle \vec{G}_0 \rangle + \frac{1}{128}\gamma^4 D_0^2 TE_{NOGSE}^6 \vec{G} \cdot \langle \Delta\vec{G}_0 \Delta\vec{G}_0 \rangle \cdot \vec{G}, \quad (\text{S.33})$$

where  $\langle \Delta\vec{G}_0 \Delta\vec{G}_0 \rangle$  is the IGDT.

- 
- [1] Callaghan, P. T. *Principles of Nuclear Magnetic Resonance Microscopy* (Oxford University Press, 1993).
  - [2] Price, W. S. Pulsed-field gradient nuclear magnetic resonance as a tool for studying translational diffusion: Part 1. basic theory. *Concepts Magn. Reson.* **9**, 299–336 (1997).
  - [3] Sen, P. N. Time-dependent diffusion coefficient as a probe of geometry. *Concepts Magn. Reson.* **23**, 1–21 (2004).
  - [4] Grebenkov, D. S. NMR survey of reflected brownian motion. *Rev. Mod. Phys.* **79**, 1077–1137 (2007).
  - [5] Gore, J. C. *et al.* Characterization of tissue structure at varying length scales using temporal diffusion spectroscopy. *NMR in Biomedicine* **23**, 745–756 (2010).
  - [6] Mitra, P. P., Sen, P. N., Schwartz, L. M. & Le Doussal, P. Diffusion propagator as a probe of the structure of porous media. *Phys. Rev. Lett.* **68**, 3555–3558 (1992).
  - [7] Bassler, P., Mattiello, J. & LeBihan, D. *J. Magn. Reson., Series B* **103**, 247 (1994).
  - [8] Bassler, P., Mattiello, J. & LeBihan, D. MR diffusion tensor spectroscopy and imaging. *Biophys. J.* **66**, 259–267 (1994).
  - [9] Kukla, V. *et al.* NMR studies of single-file diffusion in unidimensional channel zeolites. *Science* **272**, 702–704 (1996).

- [10] Kuchel, P. W., Coy, A. & Stilbs, P. NMR "diffusion-diffraction" of water revealing alignment of erythrocytes in a magnetic field and their dimensions and membrane transport characteristics. *Magn. Reson. Med.* **37**, 637–643 (1997).
- [11] Mair, R. W. *et al.* Probing porous media with gas diffusion NMR. *Phys. Rev. Lett.* **83**, 3324–3327 (1999).
- [12] Peled, S., Cory, D. G., Raymond, S. A., Kirschner, D. A. & Jolesz, F. A. Water diffusion,  $t_2$ , and compartmentation in frog sciatic nerve. *Magn. Reson. Med.* **42**, 911–918 (1999).
- [13] Song, Y.-Q., Ryu, S. & Sen, P. N. Determining multiple length scales in rocks. *Nature* **406**, 178–181 (2000).
- [14] LeBihan, D. Looking into the functional architecture of the brain with diffusion MRI. *Nat. Rev. Neurosci.* **4**, 469–480 (2003).
- [15] Song, Y.-Q., Zielinski, L. & Ryu, S. Two-dimensional NMR of diffusion systems. *Phys. Rev. Lett.* **100**, 248002 (2008).
- [16] Lawrenz, M. & Finsterbusch, J. Double-wave-vector diffusion-weighted imaging reveals microscopic diffusion anisotropy in the living human brain. *Magn. Reson. Med.* **69**, 1072–1082 (2013).
- [17] Hertel, S. A. *et al.* Magnetic-resonance pore imaging of nonsymmetric microscopic pore shapes. *Phys. Rev. E* **92**, 012808 (2015).
- [18] Ong, H. H. *et al.* Indirect measurement of regional axon diameter in excised mouse spinal cord with q-space imaging: simulation and experimental studies. *Neuroimage* **40**, 1619–1632 (2008).
- [19] Budde, M. D. & Frank, J. A. Neurite beading is sufficient to decrease the apparent diffusion coefficient after ischemic stroke. *Proc. Natl. Acad. Sci. U. S. A.* **107**, 14472–14477 (2010).
- [20] Álvarez, G. A., Shemesh, N. & Frydman, L. Coherent dynamical recoupling of diffusion-driven decoherence in magnetic resonance. *Phys. Rev. Lett.* **111**, 080404 (2013).
- [21] Shemesh, N., Álvarez, G. A. & Frydman, L. Measuring small compartment dimensions by probing diffusion dynamics via non-uniform oscillating-gradient spin-echo (NOGSE) NMR. *J. Magn. Reson.* **237**, 49–62 (2013).
- [22] Assaf, Y. & Basser, P. J. Composite hindered and restricted model of diffusion (CHARMED) MR imaging of the human brain. *Neuroimage* **27**, 48–58 (2005).
- [23] Panagiotaki, E. *et al.* Compartment models of the diffusion MR signal in brain white matter:



- A taxonomy and comparison. *Neuroimage* **59**, 2241–2254 (2012).
- [24] Warren, W. S. *et al.* MR Imaging Contrast Enhancement Based on Intermolecular Zero Quantum Coherences. *Science* **281**, 247–251 (1998).
- [25] Sen, P. & Axelrod, S. Inhomogeneity in local magnetic field due to susceptibility contrast. *J. Appl. Phys.* **86**, 4548–4554 (1999).
- [26] Faber, C., Pracht, E. & Haase, A. Resolution enhancement in in vivo NMR spectroscopy: detection of intermolecular zero-quantum coherences. *J. Magn. Reson.* **161**, 265–274 (2003).
- [27] Pathak, A., Ward, B. & Schmainda, K. A novel technique for modeling susceptibility-based contrast mechanisms for arbitrary microvascular geometries: The finite perturber method. *Neuroimage* **40**, 1130–1143 (2008).
- [28] Wharton, S. & Bowtell, R. Whole-brain susceptibility mapping at high field: A comparison of multiple- and single-orientation methods. *Neuroimage* **53**, 515–525 (2010).
- [29] Lee, J. *et al.* Sensitivity of MRI resonance frequency to the orientation of brain tissue microstructure. *Proc. Natl. Acad. Sci. U. S. A.* **107**, 5130–5135 (2010).
- [30] de Rochefort, L. *et al.* Quantitative susceptibility map reconstruction from MR phase data using bayesian regularization: Validation and application to brain imaging. *Magn. Reson. Med.* **63**, 194–206 (2010).
- [31] Li, W., Wu, B., Avram, A. & Liu, C. Magnetic susceptibility anisotropy of human brain in vivo and its molecular underpinnings. *Neuroimage* **59**, 2088–2097 (2012).
- [32] Liu, C. & Li, W. Imaging neural architecture of the brain based on its multipole magnetic response. *Neuroimage* **67**, 193–202 (2013).
- [33] Chen, W., Foxley, S. & Miller, K. Detecting microstructural properties of white matter based on compartmentalization of magnetic susceptibility. *Neuroimage* **70**, 1–9 (2013).
- [34] Liu, C. Susceptibility tensor imaging. *Magn. Reson. Med.* **63**, 1471–1477 (2010).
- [35] Lee, J. *et al.* T-2\*-based fiber orientation mapping. *Neuroimage* **57**, 225–234 (2011).
- [36] Oh, S., Kim, Y., Cho, Z. & Lee, J. Origin of b-0 orientation dependent  $r^*(2)$  ( $=1/T^*(2)$ ) in white matter. *Neuroimage* **73**, 71–79 (2013).
- [37] Liu, C., Li, W., Wu, B., Jiang, Y. & Johnson, G. 3D fiber tractography with susceptibility tensor imaging. *Neuroimage* **59**, 1290–1298 (2012).
- [38] Haacke, E., Xu, Y., Cheng, Y. & Reichenbach, J. Susceptibility weighted imaging (SWI). *Magn. Reson. Med.* **52**, 612–618 (2004).

- [39] Thomas, B. P. *et al.* High-Resolution 7t MRI of the Human Hippocampus In Vivo. *J. Magn. Reson. Imaging* **28**, 1266–1272 (2008).
- [40] Yao, B. *et al.* Susceptibility contrast in high field MRI of human brain as a function of tissue iron content. *Neuroimage* **44**, 1259–1266 (2009).
- [41] Shmueli, K. *et al.* Magnetic susceptibility mapping of brain tissue in vivo using MRI phase data. *Magn. Reson. Med.* **62**, 1510–1522 (2009).
- [42] Haacke, E. M., Mittal, S., Wu, Z., Neelavalli, J. & Cheng, Y.-C. N. Susceptibility-Weighted Imaging: Technical Aspects and Clinical Applications, Part 1. *Am. J. Neuroradiology* **30**, 19–30 (2009).
- [43] Han, S. *et al.* Magnetic field anisotropy based MR tractography. *J. Magn. Reson.* **212**, 386–393 (2011).
- [44] Álvarez, G. A., Shemesh, N. & Frydman, L. Diffusion-assisted selective dynamical recoupling: A new approach to measure background gradients in magnetic resonance. *J. Chem. Phys.* **140**, 084205 (2014).
- [45] Stepisnik, J. Time-dependent self-diffusion by NMR spin-echo. *Physica B* **183**, 343–350 (1993).
- [46] Callaghan, P. T. & Stepisnik, J. Frequency-domain analysis of spin motion using modulated-gradient NMR. *J. Magn. Reson.* **117**, 118–122 (1995).
- [47] Stepisnik, J., Lasic, S., Mohoric, A., Sersa, I. & Sepe, A. Spectral characterization of diffusion in porous media by the modulated gradient spin echo with CPMG sequence. *J. Magn. Reson.* **182**, 195–199 (2006).
- [48] Stepisnik, J. Validity limits of gaussian approximation in cumulant expansion for diffusion attenuation of spin echo. *Physica B* **270**, 110–117 (1999).
- [49] Zheng, G. & Price, W. Suppression of background gradients in (b-0 gradient-based) NMR diffusion experiments. *Concepts Magn. Reson.* **30A**, 261–277 (2007).
- [50] Cho, H., Ryu, S., Ackerman, J. & Song, Y. Visualization of inhomogeneous local magnetic field gradient due to susceptibility contrast. *J. Magn. Reson.* **198**, 88–93 (2009).
